# Supplementary material for: MyD88 regulates a prolonged adaptation response to environmental dust exposure-induced lung disease
Source: PubMed Central journal article supplement (PMC7178993; doi:10.1186/s12931-020-01362-8), 2020-04-22
Supplement: 12931_2020_1362_MOESM2_ESM.pdf [file 12931_2020_1362_MOESM2_ESM.pdf]

**Additional File 2: Isotype antibody staining.**

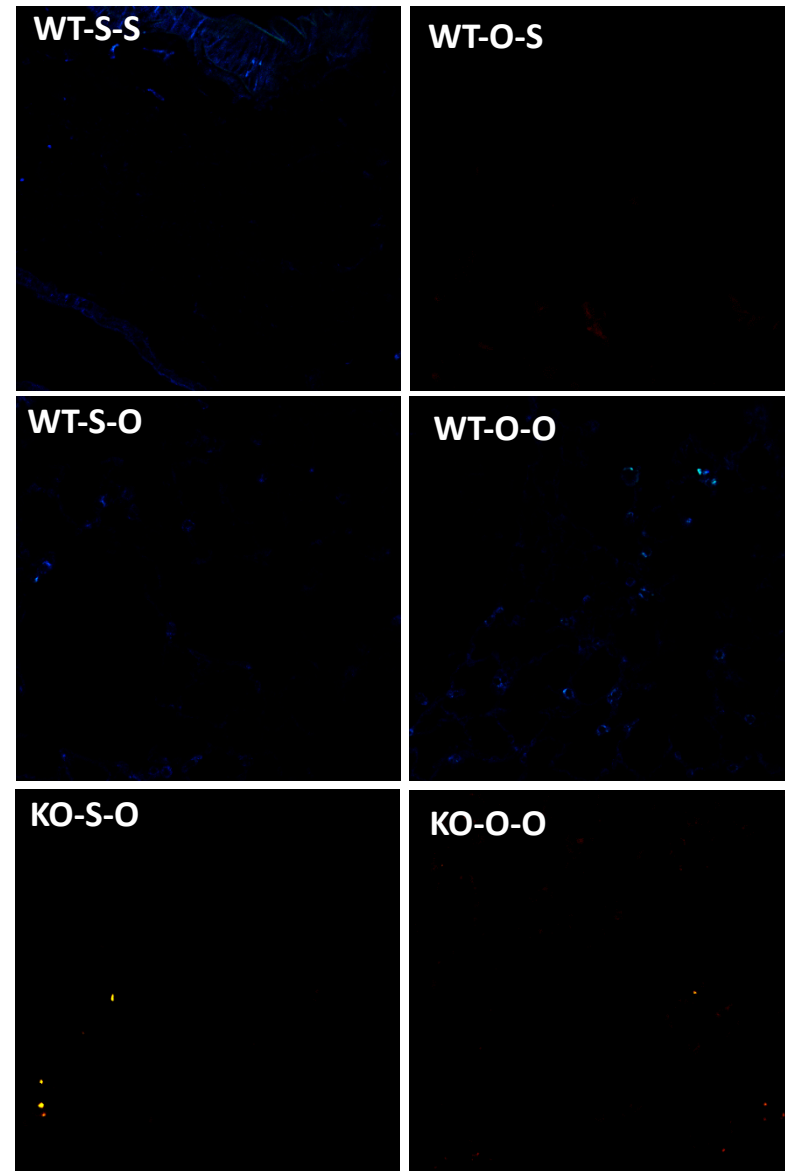

Additional File 2. Confocal images of isotype antibody staining of lung sections from WT and MyD88 KO mice repetitively exposed to ODE for 3 weeks, rested for 4 weeks, and then rechallenged once with ODE or saline. Treatment groups denoted as S-S (saline repeated exposure-saline rechallenge), O-S (ODE repeated exposure-saline rechallenge), S-O (saline repeated exposure-ODE rechallenge), O-O (ODE repeated exposure-ODE rechallenge).
